# Supplementary material for: Role of carotenoids in adipose tissue through the AMPK-mediated pathway
Source: Royal Society of Chemistry journal article supplement (doi:10.1039/d2fo03781e), 2023-01-01
Supplement: d2fo03781e1.pdf [file d2fo03781e1.pdf]

## ELETRONIC SUPPLEMENTARY INFORMATION (ESI)

**Table S1. Desing with *in vitro* studies and the main results**

| Authors                                | Cell         | Carotenoid and dose                                                                                                   | Duration | Main results                                                                                                                                                                                                                                                                                                                                                                                       |
|----------------------------------------|--------------|-----------------------------------------------------------------------------------------------------------------------|----------|----------------------------------------------------------------------------------------------------------------------------------------------------------------------------------------------------------------------------------------------------------------------------------------------------------------------------------------------------------------------------------------------------|
| 9. Liu, et al., 2017                   | 3T3-L1 cells | 5–30µM of Zeaxanthin                                                                                                  | 8 days   | 25 and 30µM had toxicity;<br>5, 10, and 15 µM zeaxanthin ↓ total lipid contents;<br>Downregulation of PPARγ gene and level protein of the peroxisome proliferator-activated receptor γ (PPARγ) decreased in a dose-dependent manner;<br>↓ Acetyl CoA carboxylase (ACC), FAS, fatty acid binding protein 4 (FABP4), and perilipin;<br>5, 10, and 15 µM induced AMPKα activation.                    |
| 10. Liu et al., 2019                   | 3T3-L1 cells | 5, 10 and 15 µM of zeaxanthin and cells on day 0 were pre-incubated with 10 µM compound C (CC), an inhibitor of AMPK. | 8 days   | ↓ lipid accumuation;<br>10 and 15 µM ↑ UCP1 and SIRT1;<br>15 µM stimulated AMPK activation; ↓ ACC, and FABP4, and induced the expression of proliferator-activated receptor gamma coactivator 1 alpha (PGC1α), uncoupling protein 1 (UCP1), and sirtuin 1(SIRT1);<br>AMPK activation were blocked with CC and the expression of adipogenic genes were induced, and browning-related genes reduced. |
| 70. Mukherjee, S., & Yun, J. W. (2022) | 3T3-L1 cells | 20 µM β-carotene                                                                                                      | 6-8 days | Upregulation of genes and protein expression of UCP1 and PGC1-α;<br>↓ protein expression of FAS and ACC;<br>Activation of AMPK;<br>↑ CPT1a protein,                                                                                                                                                                                                                                                |

|                             |              |                                                       |          |                                                                                                                                                                                                             |
|-----------------------------|--------------|-------------------------------------------------------|----------|-------------------------------------------------------------------------------------------------------------------------------------------------------------------------------------------------------------|
| 71. Yoshikawa, et al., 2020 | 3T3-L1 cells | 2.5, 5 and 10 $\mu$ M fucoxanthin                     | 72 hours | Triacylglycerol content reduced with 5 and 10 $\mu$ M; 5 and 10 $\mu$ M increased fatty acid and glycerol release and stimulated AMPK and ACC phosphorylation; 10 $\mu$ M decreased FAS protein expression. |
| 72. Lai et al., 2012        | 3T3-L1 cells | 10 and 50 $\mu$ g/mL PSO or fucoxanthin, or Xanthigen | 48 hours | 50 $\mu$ g/mL activated AMPK.                                                                                                                                                                               |
| 74. Jo et al., 2017         | 3T3-L1 cells | 10 $\mu$ M capsanthin                                 | 2 days   | Inhibited adipogenic gene expression of PPAR $\gamma$ and CCAAT/enhancer-binding protein alpha (C/EBP $\alpha$ ); induction of UCP1 and activation of AMPK.                                                 |
| 76. Kang et al., 2012       | 3T3-L1 cells | 10 $\mu$ M fucoxanthin                                | 24 hours | Stimulated AMPK, ACC and liver kinase B1 (LKB1) phosphorylation; $\uparrow$ expression of carnitine palmitoyltransferase 1a (CPT-1a).                                                                       |

**Table S2. Study desing with animal model and main results with the equivalent dose**

| Authors             | Animal model                                                         | Design                                                                                                                                      | Duration of supplementation | Main results                                                                                                                                                                                                                                                                                                                                                                                                                                                             | Human equivalent dose* |
|---------------------|----------------------------------------------------------------------|---------------------------------------------------------------------------------------------------------------------------------------------|-----------------------------|--------------------------------------------------------------------------------------------------------------------------------------------------------------------------------------------------------------------------------------------------------------------------------------------------------------------------------------------------------------------------------------------------------------------------------------------------------------------------|------------------------|
| 9. Liu et al., 2017 | Male C57BL/6J mice                                                   | Group 1: normal diet;<br>Group 2: high fat diet (HFD) for 4 weeks, and then HFD groups were received 20 and 40 mg/kg body weight zeaxanthin | 4 weeks                     | 20 mg/kg:<br>↓ body weight gain and fat accumulation in epididymal adipose tissue;<br>↓ gene expression of FAS, FABP4, and perilipin in epididymal adipose tissue;<br>AMPK activation;<br>Both doses:<br>↓ gene expression of PPAR $\gamma$ , C/EBP $\alpha$ , and SREBP1-c in epididymal adipose tissue.                                                                                                                                                                | 1.62 or 3.24 mg/kg     |
| 67. Gu et al., 2018 | C57BL/Ks J-Lepdb (db/db) mice and their lean littermates (wild-type) | Group 1: db/db;<br>Group 2: 20 mg/kg of crocin/day<br>Group 3: 20 mg/kg of crocin/day +BML-275, an inhibitor of AMPK                        | 8 weeks                     | Induced AMPK activation in adipose tissue of db/db mice;<br>↓ epididymal and perirenal adipose tissue weight;<br>↓ adipocyte size;<br>↓ gene expression of C/EBP $\alpha$ , CCAAT/enhancer-binding protein beta (C/EBP $\beta$ ), PPAR $\gamma$ in adipose tissue;<br>↑ gene expression of PPAR $\alpha$ , LPL, and HSL in adipose tissue;<br>Improvement in glucose tolerance;<br>Crocins' effects on adipocyte differentiation and lipolysis was inhibited by BML-275. | 1.62 mg/kg             |
| 69. Kang et al,     | Male 4-week-old                                                      | Group 1: Normal diet;                                                                                                                       | 70 days                     | ↓ adipocyte size in epididymal adipose tissue;<br>↑ adiponectin expression in epididymal adipose tissue;                                                                                                                                                                                                                                                                                                                                                                 | 12.16 mg/kg            |

|                            |              |                                                                                                                                                                                                      |                                 |                                                                                                                                                                                            |                          |
|----------------------------|--------------|------------------------------------------------------------------------------------------------------------------------------------------------------------------------------------------------------|---------------------------------|--------------------------------------------------------------------------------------------------------------------------------------------------------------------------------------------|--------------------------|
| 2012.                      | C57BL/6 mice | Group 2: HFD and Group 3: HFD+ 150 mg/kg body weight/day of <i>Petalonia binghamiae</i> extract (PBE) (rich in fucoxanthin)                                                                          |                                 | Activated AMPK and ACC in edididymal adipose tissue.                                                                                                                                       |                          |
| 75. Algardaby M. M. (2020) | Wistar rats  | Group 1: normal diet; Group 2: high salt food pellets and high fructose drinking water; Group 3: high salt food pellets and high fructose drinking water + 5 mg crocin/kg body weight; Group 4: high | 5 days per week during 12 weeks | 10mg/kg crocin:<br>↓ body weight gain;<br>Improved glucose tolerance;<br>Activated AMPK;<br>Both doses:<br>↓ visceral adipose tissue, HOMA-IR and serum levels of IL-6 and TNF- $\alpha$ . | 0.81 mg/kg or 1.62 mg/kg |

|                               |                                                                                                     |                                                                                                                                           |          |                                                                                                                                                           |            |
|-------------------------------|-----------------------------------------------------------------------------------------------------|-------------------------------------------------------------------------------------------------------------------------------------------|----------|-----------------------------------------------------------------------------------------------------------------------------------------------------------|------------|
|                               |                                                                                                     | salt food pellets and high fructose drinking water + 10 mg crocin/kg body weight                                                          |          |                                                                                                                                                           |            |
| 76. Fang, K., & Gu, M. (2020) | Male mice with global knockout (KO) of AMPK $\alpha$ 2 gene and Wild-type (WT) mice used as control | During 3 months HFD + a single dose of 100mg/kg streptozotocin, then seven days after, the rats with diabetes received 20 mg/kg of crocin | 12 weeks | Crocin:<br>↓ Body weight and the perirenal and epididymal adipose mass in wild type diabetic mice;<br>↓ Fasting blood glucose in wild type diabetic mice. | 1.62 mg/kg |

\*human equivalent dose calculated by body surface area (FDA, 2005).

**Reference:** U.S. Department of Health and Human Services, Food and Drug Administration, Center for Drug Evaluation and Research, Center for Biologics Evaluation and Research. (2005) Estimating the safe starting dose in clinical trials for therapeutics in adult healthy volunteers, U.S. Food and Drug Administration, Rockville, Maryland, USA, 2005.

**Table S3. Studies with clinical trials**

| Authors                      | Type of clinical trial                                                              | Individuals                                                                                                                        | Design                                                                                             | Duration of supplementation | Main results                                                                                            |
|------------------------------|-------------------------------------------------------------------------------------|------------------------------------------------------------------------------------------------------------------------------------|----------------------------------------------------------------------------------------------------|-----------------------------|---------------------------------------------------------------------------------------------------------|
| 77. Behrouz et al., 2020     | Randomized, double-blind, single center, parallel-group, controlled clinical trial. | Adults with BMI between 18.5 and 30 kg/m <sup>2</sup>                                                                              | Placebo grupo or Treated group with 2 tablets of 15 mg crocin in main meals (breakfast and dinner) | 12 weeks                    | Greater decrease in fasting blood glucose, insulin and HOMA-IR;<br>AMPK phosphorylation did not change. |
| 78. Abedimanesh et al., 2020 | Randomized, double-blind placebo-controlled clinical trial                          | Adults patients with coronary artery disease (male and female age 40-65 years old without the experience of myocardial infarction) | Group 1: 30 mg/day crocin;<br>Group 2: 30 mg/day saffron aqueous extract;<br>Group 3: placebo      | 8 weeks                     | ↓ serum MCP-1 and NF-kB expression;<br>↑ gene expression of AMPK and SIRT1.                             |
| 81. Canas et                 | Randomized,                                                                         | Children with a                                                                                                                    | Group 1                                                                                            | 6 months                    | ↑ total adiponectin and HMW-ADI form;                                                                   |

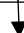

|                           |                                      |                                     |                                                                                                                                                                                                                                                                |         |                                                                                                                                                                                                                      |
|---------------------------|--------------------------------------|-------------------------------------|----------------------------------------------------------------------------------------------------------------------------------------------------------------------------------------------------------------------------------------------------------------|---------|----------------------------------------------------------------------------------------------------------------------------------------------------------------------------------------------------------------------|
| al., 2017                 | double-blinded                       | BMI at or above the 90th percentile | received two capsules of mixed carotenoids (2000 IU of $\beta$ -carotene, 500 $\mu$ g of $\alpha$ -carotene, 10 mg of lutein, 2 mg of zeaxanthin, 10 mg of lycopene, 500 $\mu$ g of astaxanthin, and 10 mg of $\gamma$ -tocopherol in each capsule) or placebo |         | subcutaneous adipose tissue;<br>The percentage change in subcutaneous adipose tissue was correlated to the percentage change in serum $\beta$ -carotene.                                                             |
| 82. Mashhadi et al., 2018 | Randomized, placebo-controlled trial | Adults with type 2 diabetes         | Group 1: 8 mg astaxanthin; Group                                                                                                                                                                                                                               | 8 weeks | <ul style="list-style-type: none"> <li>↑ Serum adiponectin;</li> <li>↓ Visceral body fat mass; serum triglyceride (TG), very low-density lipoprotein (VLDL) cholesterol, and fructosamine concentrations.</li> </ul> |

|                          |                                                    |                                                       |                                                                                                                          |          |                                                                                                           |
|--------------------------|----------------------------------------------------|-------------------------------------------------------|--------------------------------------------------------------------------------------------------------------------------|----------|-----------------------------------------------------------------------------------------------------------|
|                          |                                                    |                                                       | 2: placebo                                                                                                               |          |                                                                                                           |
| 83. Yoshida et al., 2010 | Randomized, double-blind, placebo controlled study | Healthy subjects with moderately hypertriglyceridemic | Group 1: placebo, Group 2: 6 mg/day of astaxanthin, Group 3: 12 mg/day of astaxanthin, Group 4: 18 mg/day of astaxanthin | 12 weeks | Astaxanthin groups ↓ serum TG and increased HDL-cholesterol; 12 and 18 mg/day ↑ serum adiponectin levels. |
